# Supplementary material
Source: Elsevier journal article supplement (https://www.sciencedirect.com/science/article/pii/S2530064420300420)
Supplement: mmc1 [file S2530064420300420:mmc1.docx]

Supplementary Material

Table 1. Occurrences with an estimated number of individuals of a non-native species of willow (*Salix* × *rubens*) reported in southern Brazilian highlands. N = Number of individuals; Watercourse = Along watercourse, Road = Along road, Yard = In yard (cultivated), Plantation = Planted (cultivated); Width = watercourse width (m), Mun = Municipality, where: Vac = Vacaria, Sjo = São Joaquim, BJS = Bom Jardim da Serra, MuC = Muitos Capões, Uru = Urubici, CaA = Capão Alto, RiR = Rio Rufino, BoR = Bom Retiro, BoS = Bocaína do Sul; RS = State of Rio Grande do Sul, SC = State of Santa Catarina.

| **Latitude** | **Longitude** | **Altitude** | **N** | **Habitat** | **Watercourse ID** | **Width** | **Mun** | **State** |
| --- | --- | --- | --- | --- | --- | --- | --- | --- |
| -28.44791 | -50.88102 | 899 | 10 | Watercourse | Porteira stream | 17 | Vac | RS |
| -28.44120 | -49.88769 | 927 | 5 | Watercourse | NA | 15 | SJo | SC |
| -28.40553 | -51.04788 | 888 | 1 | Watercourse | Guerreiro stream | 3 | Vac | RS |
| -28.34256 | -49.60604 | 1265 | 10 | Watercourse | NA | 7 | BJS | SC |
| -28.33986 | -49.63204 | 1230 | 10 | Watercourse | Pelotas river tributary | 11.3 | BJS | SC |
| -28.33721 | -49.65041 | 1216 | 110 | Watercourse | Pelotas river tributary | 15.65 | BJS | SC |
| -28.33510 | -49.67677 | 1195 | 50 | Watercourse | Pelotas river | 34 | BJS | SC |
| -28.33507 | -49.67614 | 1193 | 100 | Watercourse | Pelotas river | 35 | BJS | SC |
| -28.31695 | -49.61746 | 1305 | 1 | Watercourse | NA | 1 | BJS | SC |
| -28.31689 | -49.61653 | 1313 | 3 | Yard / Watercourse | NA | NA | BJS | SC |
| -28.31301 | -49.71467 | 1205 | 10 | Watercourse | Porteira river | 6 | BJS | SC |
| -28.31262 | -49.71471 | 1205 | 50 | Watercourse | Pelotas river tributary | 5.7 | BJS | SC |
| -28.30771 | -49.62262 | 1287 | 1 | Yard | NA | NA | BJS | SC |
| -28.30358 | -51.37598 | 826 | 10 | Road / Watercourse | NA | NA | MuC | RS |
| -28.29553 | -49.62660 | 1365 | 2 | Yard | NA | NA | BJS | SC |
| -28.29069 | -49.56694 | 1290 | 10 | Watercourse | NA | 2 | BJS | SC |
| -28.27325 | -49.75648 | 1370 | 1 | Watercourse | NA | 0.5 | BJS | SC |
| -28.26890 | -49.76062 | 1325 | 10 | Watercourse | Mantiqueira river | 5 | BJS | SC |
| -28.26832 | -49.62226 | 1377 | 3 | Yard / Watercourse | NA | NA | BJS | SC |
| -28.26293 | -49.76230 | 1325 | 10 | Watercourse | Mantiqueira river | 3 | BJS | SC |
| -28.26289 | -49.76223 | 1327 | 6 | Yard / Watercourse | NA | 3 | BJS | SC |
| -28.25849 | -49.96371 | 1180 | 10 | Yard | NA | NA | SJo | SC |
| -28.24959 | -49.77814 | 1505 | 5 | Yard | NA | NA | BJS | SC |
| -28.24955 | -49.77807 | 1505 | 6 | Yard | NA | NA | SJo | SC |
| -28.24943 | -49.61622 | 1282 | 10 | Watercourse | Pelotas river tributary | 3.7 | BJS | SC |
| -28.24915 | -49.61640 | 1280 | 1 | Watercourse | NA | 2.5 | BJS | SC |
| -28.24740 | -49.78379 | 1474 | 1 | Yard | NA | NA | BJS | SC |
| -28.24606 | -49.61711 | 1270 | 25 | Watercourse | Pelotas river | 9.4 | BJS | SC |
| -28.24571 | -49.61600 | 1280 | 10 | Yard / Watercourse | NA | 11 | BJS | SC |
| -28.24333 | -49.79358 | 1475 | 1 | Yard | NA | NA | SJo | SC |
| -28.23439 | -49.82126 | 1445 | 1 | Yard / Watercourse | NA | 2 | SJo | SC |
| -28.23402 | -49.82149 | 1450 | 30 | Watercourse | NA | 1 | BJS | SC |
| -28.23122 | -49.60137 | 1288 | 25 | Watercourse | Pelotas river | 12.7 | BJS | SC |
| -28.23071 | -49.60122 | 1285 | 20 | Watercourse | NA | 7.5 | BJS | SC |
| -28.22823 | -49.81264 | 1500 | 10 | Yard | NA | NA | SJo | SC |
| -28.22132 | -49.79866 | 1490 | 10 | Watercourse | NA | 1 | BJS | SC |
| -28.22063 | -49.79766 | 1480 | 20 | Yard / Road | NA | NA | SJo | SC |
| -28.21975 | -49.79224 | 1465 | 10 | Yard / Watercourse | NA | 2 | SJo | SC |
| -28.20903 | -49.57890 | 1346 | 10 | Yard / Watercourse | NA | 10 | BJS | SC |
| -28.20893 | -49.57888 | 1345 | 2 | Yard | NA | NA | BJS | SC |
| -28.20181 | -49.57649 | 1648 | 2 | Watercourse | Pelotas river | 10 | BJS | SC |
| -28.20024 | -49.61729 | 1568 | 1 | Yard | NA | NA | BJS | SC |
| -28.19719 | -49.76633 | 1265 | 1 | Watercourse | NA | 3 | SJo | SC |
| -28.19689 | -49.76685 | 1264 | 5 | Watercourse | NA | 3 | Uru | SC |
| -28.19654 | -49.57947 | 1350 | 1 | Watercourse | NA | 17 | BJS | SC |
| -28.19624 | -49.57962 | 1352 | 3 | Watercourse | Pelotas river | 12 | BJS | SC |
| -28.18271 | -49.57644 | 1374 | 2 | Watercourse | NA | 1.5 | BJS | SC |
| -28.18260 | -49.75679 | 1285 | 1 | Yard | NA | NA | SJo | SC |
| -28.17312 | -49.57367 | 1401 | 5 | Watercourse | NA | 1.5 | BJS | SC |
| -28.17015 | -49.57769 | 1418 | 10 | Watercourse | NA | 1.5 | BJS | SC |
| -28.16999 | -49.55995 | 1407 | 50 | Plantation/Watercourse | Pelotas river | 9 | BJS | SC |
| -28.16964 | -49.57857 | 1421 | 20 | Watercourse | NA | 1.5 | BJS | SC |
| -28.16947 | -49.56504 | 1388 | 50 | Plantation/Watercourse | Pelotas river | 9.5 | BJS | SC |
| -28.16593 | -49.76083 | 1187 | 20 | Watercourse | Pericó river tributary | 4.5 | Uru | SC |
| -28.16560 | -49.60312 | 1635 | 2 | Yard | NA | NA | BJS | SC |
| -28.16233 | -49.75858 | 1189 | 20 | Watercourse | Pericó river tributary | 4.5 | Uru | SC |
| -28.16146 | -49.75553 | 1170 | 50 | Watercourse | Pericó river | 7 | SJo | SC |
| -28.15349 | -49.72018 | 1195 | 10 | Watercourse | NA | 9 | Uru | SC |
| -28.15261 | -49.71841 | 1195 | 20 | Watercourse | Lava Tudo river | 6.3 | Uru | SC |
| -28.14622 | -49.70996 | 1212 | 10 | Watercourse | Lava Tudo river | 6 | Uru | SC |
| -28.14052 | -49.63598 | 1350 | 5 | Watercourse | Lava Tudo river tributary | 1 | Uru | SC |
| -28.13967 | -49.63750 | 1340 | 1 | Watercourse | Lava Tudo river tributary | 4 | Uru | SC |
| -28.13958 | -49.63719 | 1344 | 2 | Watercourse | Lava Tudo river tributary | 4 | Uru | SC |
| -28.13957 | -49.63779 | 1346 | 10 | Watercourse | Lava Tudo river tributary | 4 | Uru | SC |
| -28.13952 | -49.63816 | 1352 | 10 | Watercourse | Lava Tudo river tributary | 4 | Uru | SC |
| -28.13951 | -49.63766 | 1342 | 1 | Watercourse | Lava Tudo river tributary | 4 | Uru | SC |
| -28.13937 | -49.63808 | 1350 | 1 | Watercourse | Lava Tudo river tributary | 4 | Uru | SC |
| -28.13744 | -49.69934 | 1225 | 30 | Watercourse | Lava Tudo river | 6 | Uru | SC |
| -28.13738 | -49.64861 | 1320 | 10 | Watercourse | NA | 3 | Uru | SC |
| -28.13732 | -49.69969 | 1230 | 50 | Watercourse | Lava Tudo river | 6.5 | Uru | SC |
| -28.13269 | -49.65357 | 1295 | 20 | Watercourse | NA | 3 | Uru | SC |
| -28.13069 | -49.68141 | 1308 | 5 | Watercourse | NA | 1 | Uru | SC |
| -28.12490 | -49.65442 | 1305 | 10 | Watercourse | Lava Tudo river tributary | 4 | Uru | SC |
| -28.11735 | -49.65057 | 1320 | 10 | Watercourse | Lava Tudo river tributary | 4 | Uru | SC |
| -28.10847 | -49.64734 | 1375 | 5 | Yard | NA | NA | Uru | SC |
| -28.09006 | -50.06084 | 980 | 5 | Watercourse | Lava Tudo river | 50 | SJo | SC |
| -28.08958 | -50.06115 | 988 | 2 | Watercourse | Lava Tudo river | 62 | SJo | SC |
| -28.07001 | -49.51206 | 1400 | 80 | Wetland | NA | NA | Uru | SC |
| -28.05790 | -49.42590 | 960 | 1 | Watercourse | Canoas river tributary | 7 | Uru | SC |
| -28.05481 | -49.48006 | 961 | 2 | Watercourse | NA | 1.5 | Uru | SC |
| -28.04788 | -49.45143 | 940 | 5 | Watercourse | Canoas river tributary | 1.5 | Uru | SC |
| -28.04125 | -49.47296 | 924 | 20 | Watercourse | Canoas river | 30 | Uru | SC |
| -28.04035 | -49.48553 | 929 | 1 | Yard | NA | NA | Uru | SC |
| -28.02624 | -49.49712 | 950 | 5 | Watercourse | NA | NA | Uru | SC |
| -28.01914 | -49.51172 | 925 | 2 | Watercourse | Canoas river tributary | 2 | Uru | SC |
| -28.01895 | -49.51185 | 936 | 5 | Yard / Watercourse | Canoas river tributary | 10 | Uru | SC |
| -28.00922 | -49.53550 | 910 | 10 | Yard | NA | NA | Uru | SC |
| -28.00814 | -49.53661 | 892 | 8 | Yard | NA | NA | Uru | SC |
| -27.97805 | -49.59925 | 896 | 15 | Watercourse | NA | 1 | Uru | SC |
| -27.97776 | -49.58174 | 896 | 10 | Watercourse | Canoas river | 27 | Uru | SC |
| -27.97428 | -49.60760 | 892 | 2 | Watercourse | NA | 0.5 | Uru | SC |
| -27.97375 | -49.60922 | 893 | 50 | Plantation | NA | NA | RiR | SC |
| -27.97361 | -49.60954 | 895 | 10 | Watercourse | NA | 1 | Uru | SC |
| -27.96426 | -49.64517 | 880 | 5 | Watercourse | NA | 1.5 | Uru | SC |
| -27.96045 | -49.64639 | 879 | 1 | Floodplain | NA | NA | Uru | SC |
| -27.95991 | -49.66708 | 890 | 5 | Watercourse | Canoas river | 40 | Uru | SC |
| -27.95947 | -49.65780 | 880 | 1 | Watercourse | Canoas river | 20 | Uru | SC |
| -27.95931 | -49.65377 | 881 | 1 | Watercourse | Canoas river | 20 | Uru | SC |
| -27.95859 | -49.67224 | 880 | 15 | Watercourse | Canoas river | 32 | Uru | SC |
| -27.95826 | -49.67699 | 886 | 15 | Watercourse | Canoas river tributary | 5.2 | Uru | SC |
| -27.95101 | -49.58196 | 912 | 1 | Watercourse | Águas Brancas river | 5 | Uru | SC |
| -27.94134 | -49.69592 | 875 | 10 | Watercourse | Canoas river | 35 | Uru | SC |
| -27.93989 | -49.69889 | 878 | 2 | Watercourse | Canoas river | 35.9 | Uru | SC |
| -27.93540 | -49.70795 | 879 | 1 | Watercourse | Canoas river tributary | 7.8 | Uru | SC |
| -27.93423 | -49.70908 | 867 | 50 | Plantation | NA | NA | RiR | SC |
| -27.90983 | -50.44697 | 905 | 10 | Yard | NA | NA | CaA | SC |
| -27.90778 | -49.73359 | 868 | 10 | Watercourse | NA | 1 | RiR | SC |
| -27.90259 | -49.74598 | 865 | 1 | Watercourse | NA | 10 | RiR | SC |
| -27.89747 | -49.43879 | 960 | 10 | Watercourse | NA | 8 | BoR | SC |
| -27.88161 | -49.75707 | 866 | 1 | Watercourse | NA | 1 | RiR | SC |
| -27.88036 | -49.75768 | 828 | 30 | Watercourse | NA | 0.5 | RiR | SC |
| -27.86285 | -49.77311 | 864 | 1 | Floodplain | NA | NA | RiR | SC |
| -27.86212 | -49.77376 | 871 | 4 | Floodplain | NA | NA | RiR | SC |
| -27.86072 | -49.78215 | 870 | 50 | Watercourse / Floodplain | NA | 4.3 | RiR | SC |
| -27.86007 | -49.77568 | 840 | 50 | Plantation | NA | NA | RiR | SC |
| -27.85974 | -49.78231 | 866 | 1 | Watercourse | NA | 2 | RiR | SC |
| -27.85874 | -49.77923 | 860 | 30 | Watercourse | NA | 1 | RiR | SC |
| -27.85784 | -49.78344 | 836 | 50 | Plantation/Watercourse | NA | 1.15 | RiR | SC |
| -27.84548 | -49.77993 | 877 | 35 | Watercourse | NA | 1 | RiR | SC |
| -27.83359 | -49.78110 | 881 | 15 | Watercourse | Canoas river | 22 | RiR | SC |
| -27.82390 | -49.56907 | 867 | 5 | Watercourse | João Paulo river | 20 | BoR | SC |
| -27.82039 | -49.78037 | 840 | 50 | Plantation | NA | NA | RiR | SC |
| -27.81326 | -49.59211 | 885 | 1 | Watercourse | NA | 2 | BoR | SC |
| -27.79392 | -49.79880 | 845 | 5 | Watercourse | NA | 10 | BoS | SC |
| -27.74100 | -49.94387 | 847 | 100 | Plantation | NA | NA | BoS | SC |
| -27.73997 | -49.90242 | 845 | 2 | Watercourse | Piurras river | 10 | BoS | SC |
| -27.73680 | -49.95387 | 846 | 50 | Watercourse / Floodplain | Bonito river | 8.7 | BoS | SC |
| -27.73624 | -49.79839 | 847 | 5 | Watercourse | Canoas river | 32 | BoS | SC |
